# Supplementary material for: Validation of a HILIC UHPLC-MS/MS Method for Amino Acid Profiling in Triticum Species Wheat Flours
Source: PubMed Central journal article supplement (PMC6836243; doi:10.3390/foods8100514), 2019-10-18
Supplement: foods-08-00514-s001.pdf [file foods-08-00514-s001.pdf]

## Supplementary Material

**Table S1.** Amino acids monoisotopic masses, MRM<sub>s</sub>, retention times ( $t_R$ ) and conditions in the mass spectrometer along with their respective molecular formulas.

| Analyte          | Molecular Formula                                                           | Monoisotopic mass | Precursor Ion | Product Ion | Collision Energy (V) | Tube Lens | $t_R$ standard solutions (min) (Mean $\pm$ S <sub>d</sub> *) | $t_R$ hydrolysed sample (min) (Mean $\pm$ S <sub>d</sub> *) |
|------------------|-----------------------------------------------------------------------------|-------------------|---------------|-------------|----------------------|-----------|--------------------------------------------------------------|-------------------------------------------------------------|
| Phe              | C <sub>9</sub> H <sub>11</sub> NO <sub>2</sub>                              | 165.19            | 166.1         | 120.2       | 14                   | 47        | 2.50 $\pm$ 0.06                                              | 3.12 $\pm$ 0.13                                             |
| Trp              | C <sub>11</sub> H <sub>12</sub> N <sub>2</sub> O <sub>2</sub>               | 204.23            | 205.1         | 188.1       | 12                   | 52        | 2.58 $\pm$ 0.06                                              | -                                                           |
| Ile              | C <sub>6</sub> H <sub>13</sub> NO <sub>2</sub>                              | 131.17            | 132.1         | 86.3        | 6                    | 40        | 2.67 $\pm$ 0.06                                              | 3.18 $\pm$ 0.15                                             |
| Leu              | C <sub>6</sub> H <sub>13</sub> NO <sub>2</sub>                              | 131.17            | 132.1         | 86.3        | 11                   | 49        | 3.19 $\pm$ 0.07                                              | 3.38 $\pm$ 0.17                                             |
| Asn              | C <sub>4</sub> H <sub>8</sub> N <sub>2</sub> O <sub>3</sub>                 | 132.12            | 133.1         | 87.2        | 8                    | 49        | 2.74 $\pm$ 0.05                                              | -                                                           |
| Met              | C <sub>5</sub> H <sub>11</sub> NO <sub>2</sub> S                            | 149.21            | 150.1         | 56.4        | 17                   | 46        | 3.15 $\pm$ 0.07                                              | 3.70 $\pm$ 0.12                                             |
| Val              | C <sub>5</sub> H <sub>11</sub> NO <sub>2</sub>                              | 117.15            | 118.1         | 72.3        | 11                   | 46        | 3.22 $\pm$ 0.03                                              | 3.99 $\pm$ 0.14                                             |
| Pro              | C <sub>5</sub> H <sub>9</sub> NO <sub>2</sub>                               | 115.13            | 116.1         | 70.3        | 17                   | 51        | 3.56 $\pm$ 0.07                                              | 4.02 $\pm$ 0.16                                             |
| Tyr              | C <sub>9</sub> H <sub>11</sub> NO <sub>3</sub>                              | 181.19            | 182.1         | 136.2       | 14                   | 46        | 3.53 $\pm$ 0.05                                              | 4.24 $\pm$ 0.12                                             |
| Ala              | C <sub>3</sub> H <sub>7</sub> NO <sub>2</sub>                               | 89.094            | 90.1          | 44.5        | 10                   | 40        | 4.55 $\pm$ 0.10                                              | 5.26 $\pm$ 0.11                                             |
| Thr              | C <sub>4</sub> H <sub>9</sub> NO <sub>3</sub>                               | 119.12            | 120.1         | 74.3        | 11                   | 46        | 4.91 $\pm$ 0.03                                              | 5.73 $\pm$ 0.11                                             |
| Gly              | C <sub>2</sub> H <sub>5</sub> NO <sub>2</sub>                               | 75.07             | 76.1          | 30.6        | 12                   | 40        | 5.22 $\pm$ 0.04                                              | 5.85 $\pm$ 0.15                                             |
| Ser              | C <sub>3</sub> H <sub>7</sub> NO <sub>3</sub>                               | 105.09            | 106.1         | 60.4        | 12                   | 60        | 5.74 $\pm$ 0.07                                              | 6.47 $\pm$ 0.13                                             |
| Glu              | C <sub>5</sub> H <sub>9</sub> NO <sub>4</sub>                               | 147.13            | 148.0         | 84.0        | 15                   | 70        | 5.94 $\pm$ 0.09                                              | 6.85 $\pm$ 0.11                                             |
| Asp              | C <sub>4</sub> H <sub>7</sub> NO <sub>4</sub>                               | 133.11            | 134.1         | 88.3        | 11                   | 70        | 7.86 $\pm$ 0.12                                              | 8.81 $\pm$ 0.16                                             |
| Arg              | C <sub>6</sub> H <sub>14</sub> N <sub>4</sub> O <sub>2</sub>                | 174.20            | 175.1         | 70.3        | 23                   | 54        | 8.35 $\pm$ 0.11                                              | 9.18 $\pm$ 0.11                                             |
| Gln              | C <sub>5</sub> H <sub>10</sub> N <sub>2</sub> O <sub>3</sub>                | 146.15            | 147.1         | 130.2       | 9                    | 45        | 8.78 $\pm$ 0.12                                              | 9.54 $\pm$ 0.12                                             |
| Lys              | C <sub>6</sub> H <sub>14</sub> N <sub>2</sub> O <sub>2</sub>                | 146.11            | 147.1         | 84.3        | 17                   | 48        | 8.79 $\pm$ 0.11                                              | 9.54 $\pm$ 0.14                                             |
| His              | C <sub>6</sub> H <sub>9</sub> N <sub>3</sub> O <sub>2</sub>                 | 155.16            | 156.1         | 110.2       | 15                   | 49        | 9.20 $\pm$ 0.10                                              | 9.92 $\pm$ 0.17                                             |
| Cys <sub>2</sub> | C <sub>6</sub> H <sub>12</sub> N <sub>2</sub> O <sub>4</sub> S <sub>2</sub> | 240.29            | 241.0         | 152.0       | 13                   | 76        | 10.24 $\pm$ 0.08                                             | -                                                           |
| Cys              | C <sub>3</sub> H <sub>7</sub> NO <sub>2</sub> S                             | 121.16            | 122.1         | 59.3        | 20                   | 44        | 1.84 $\pm$ 0.06                                              | -                                                           |

\* For S<sub>d</sub> calculation n=6.

**Table S2.** Precision and trueness data for the analysis of AA in spiked B-90 bread wheat sample.

| Target Amino acid | Added (mg/100 g) | Repeatability (n=3) |              |         | Intermediate precision (n=3) |              |         |
|-------------------|------------------|---------------------|--------------|---------|------------------------------|--------------|---------|
|                   |                  | Found (mg/100 g)    | Recovery (%) | RSD (%) | Found (mg/100 g)             | Recovery (%) | RSD (%) |
| Gly               | 20.0             | 19.0                | 94.8         | 8.7     | 19.2                         | 96.0         | 7.9     |
|                   | 40.0             | 43.9                | 109.8        | 2.9     | 44.5                         | 111.2        | 6.6     |
| Ala               | 20.0             | 19.9                | 99.6         | 6.2     | 20.2                         | 100.8        | 4.8     |
|                   | 40.0             | 46.5                | 116.2        | 4.4     | 47.0                         | 117.6        | 3.4     |
| Ser               | 20.0             | 21.3                | 106.3        | 2.3     | 21.52                        | 107.6        | 1.4     |
|                   | 40.0             | 40.5                | 101.3        | 6.5     | 41.04                        | 102.6        | 3.5     |
| Pro               | 20.0             | 20.1                | 100.7        | 7.2     | 20.4                         | 101.9        | 3.2     |
|                   | 40.0             | 39.2                | 98.1         | 13.9    | 39.7                         | 99.3         | 9.8     |
| Val               | 20.0             | 20.1                | 100.3        | 2.9     | 20.3                         | 101.5        | 3.6     |
|                   | 40.0             | 39.7                | 99.3         | 6.8     | 40.2                         | 100.5        | 8.7     |
| Thr               | 20.0             | 19.3                | 96.5         | 4.6     | 19.5                         | 97.7         | 2.8     |
|                   | 40.0             | 41.9                | 104.7        | 6.6     | 42.4                         | 106.0        | 6.7     |
| Asp               | 20.0             | 20.6                | 103.2        | 0.9     | 20.9                         | 104.5        | 2.7     |
|                   | 40.0             | 46.2                | 115.4        | 1.7     | 46.7                         | 116.8        | 4.3     |
| Glu               | 20.0             | 18.8                | 93.8         | 0.6     | 19.0                         | 95.0         | 1.8     |

|            |      |      |       |      |      |       |      |
|------------|------|------|-------|------|------|-------|------|
|            | 40.0 | 35.6 | 88.9  | 4.8  | 36.0 | 90.0  | 7.2  |
| <b>Ile</b> | 20.0 | 19.4 | 97.0  | 2.3  | 19.6 | 98.2  | 5.2  |
|            | 40.0 | 39.3 | 98.2  | 5.3  | 39.8 | 99.4  | 8.9  |
| <b>Leu</b> | 20.0 | 19.4 | 97.0  | 2.3  | 19.6 | 98.2  | 6.1  |
|            | 40.0 | 48.7 | 121.8 | 2.8  | 49.3 | 123.3 | 5.4  |
| <b>Gln</b> | 20.0 | 18.9 | 94.4  | 6.5  | 19.1 | 95.6  | 5.6  |
|            | 40.0 | 38.9 | 97.3  | 9.2  | 39.4 | 98.5  | 8.7  |
| <b>Lys</b> | 20.0 | 20.8 | 104.2 | 3.7  | 21.1 | 105.5 | 3.1  |
|            | 40.0 | 34.3 | 85.7  | 5.6  | 34.7 | 86.8  | 13.7 |
| <b>Met</b> | 20.0 | 20.6 | 103.0 | 9.8  | 20.9 | 104.3 | 5.5  |
|            | 40.0 | 48.1 | 120.2 | 5.7  | 48.7 | 121.7 | 7.6  |
| <b>His</b> | 20.0 | 18.8 | 93.9  | 1.8  | 19.0 | 95.1  | 2.3  |
|            | 40.0 | 44.5 | 111.3 | 5.5  | 45.1 | 112.7 | 2.7  |
| <b>Phe</b> | 20.0 | 20.6 | 102.9 | 2.3  | 20.8 | 104.2 | 8.4  |
|            | 40.0 | 40.1 | 100.2 | 11.1 | 40.6 | 101.4 | 11.3 |
| <b>Arg</b> | 20.0 | 19.1 | 95.3  | 7.3  | 19.3 | 96.5  | 5.6  |
|            | 40.0 | 39.0 | 97.6  | 10.2 | 39.5 | 98.8  | 4.3  |
| <b>Tyr</b> | 20.0 | 20.4 | 102.0 | 4.0  | 20.7 | 103.3 | 3.8  |
|            | 40.0 | 39.9 | 99.9  | 8.3  | 40.4 | 101.1 | 9.7  |
